# Supplementary material
Source: PubMed Central journal article supplement (PMC4681850)
Supplement: ismej2015104x3.pdf [file ismej2015104x3.pdf]

**Supplementary Table S3: Primer sequences used in this study.****Primers used for target amplification library construction**

|             |                                                                    |
|-------------|--------------------------------------------------------------------|
| 341Fv3      | AATGATACGGCGACCACCGAGATCTACACCTATGGTAATTCGTCCCTACGGRAGGCAGCAG      |
| 806Rcomp001 | CAAGCAGAAGACGGCATAACGAGATCCTTATCGAGTCAGTCAGCCGGACTACCRGGGTATCTAAT  |
| 806Rcomp002 | CAAGCAGAAGACGGCATAACGAGATAGGTCTACAGTCAGTCAGCCGGACTACCRGGGTATCTAAT  |
| 806Rcomp003 | CAAGCAGAAGACGGCATAACGAGATTCTTGATCAGTCAGTCAGCCGGACTACCRGGGTATCTAAT  |
| 806Rcomp004 | CAAGCAGAAGACGGCATAACGAGATTTAACCGAGTCAGTCAGCCGGACTACCRGGGTATCTAAT   |
| 806Rcomp005 | CAAGCAGAAGACGGCATAACGAGATCATGCAACAGTCAGTCAGCCGGACTACCRGGGTATCTAAT  |
| 806Rcomp006 | CAAGCAGAAGACGGCATAACGAGATTGGTTTCTAGTCAGTCAGCCGGACTACCRGGGTATCTAAT  |
| 806Rcomp007 | CAAGCAGAAGACGGCATAACGAGATTACCTTCGAGTCAGTCAGCCGGACTACCRGGGTATCTAAT  |
| 806Rcomp008 | CAAGCAGAAGACGGCATAACGAGATTCGTGAACAGTCAGTCAGCCGGACTACCRGGGTATCTAAT  |
| 806Rcomp009 | CAAGCAGAAGACGGCATAACGAGATGTGAGTGAAGTCAGTCAGCCGGACTACCRGGGTATCTAAT  |
| 806Rcomp010 | CAAGCAGAAGACGGCATAACGAGATGGTAGCAAAGTCAGTCAGCCGGACTACCRGGGTATCTAAT  |
| 806Rcomp011 | CAAGCAGAAGACGGCATAACGAGATCAACAGGAAGTCAGTCAGCCGGACTACCRGGGTATCTAAT  |
| 806Rcomp012 | CAAGCAGAAGACGGCATAACGAGATAGGTTTCGTAGTCAGTCAGCCGGACTACCRGGGTATCTAAT |
| 806Rcomp013 | CAAGCAGAAGACGGCATAACGAGATGAAGACCAAGTCAGTCAGCCGGACTACCRGGGTATCTAAT  |
| 806Rcomp014 | CAAGCAGAAGACGGCATAACGAGATGACTTCTCAGTCAGTCAGCCGGACTACCRGGGTATCTAAT  |
| 806Rcomp015 | CAAGCAGAAGACGGCATAACGAGATATCCTTTCAGTCAGTCAGCCGGACTACCRGGGTATCTAAT  |
| 806Rcomp016 | CAAGCAGAAGACGGCATAACGAGATCCTTTCGTAAGTCAGTCAGCCGGACTACCRGGGTATCTAAT |
| 806Rcomp017 | CAAGCAGAAGACGGCATAACGAGATGAAGCATGAGTCAGTCAGCCGGACTACCRGGGTATCTAAT  |
| 806Rcomp018 | CAAGCAGAAGACGGCATAACGAGATCTAGCTTCAGTCAGTCAGCCGGACTACCRGGGTATCTAAT  |
| 806Rcomp019 | CAAGCAGAAGACGGCATAACGAGATTGGTACGTAGTCAGTCAGCCGGACTACCRGGGTATCTAAT  |
| 806Rcomp020 | CAAGCAGAAGACGGCATAACGAGATACGTGAAGAGTCAGTCAGCCGGACTACCRGGGTATCTAAT  |
| 806Rcomp021 | CAAGCAGAAGACGGCATAACGAGATCCTTGGAAAAGTCAGTCAGCCGGACTACCRGGGTATCTAAT |
| 806Rcomp022 | CAAGCAGAAGACGGCATAACGAGATCACTCAGAAGTCAGTCAGCCGGACTACCRGGGTATCTAAT  |
| 806Rcomp023 | CAAGCAGAAGACGGCATAACGAGATAGACTGTCAGTCAGTCAGCCGGACTACCRGGGTATCTAAT  |
| 806Rcomp024 | CAAGCAGAAGACGGCATAACGAGATTCCAGTTCAGTCAGTCAGCCGGACTACCRGGGTATCTAAT  |
| 806Rcomp025 | CAAGCAGAAGACGGCATAACGAGATTCAGCTCTAGTCAGTCAGCCGGACTACCRGGGTATCTAAT  |
| 806Rcomp026 | CAAGCAGAAGACGGCATAACGAGATTAGGTTTCGAGTCAGTCAGCCGGACTACCRGGGTATCTAAT |
| 806Rcomp027 | CAAGCAGAAGACGGCATAACGAGATTGTCTCAAGTCAGTCAGCCGGACTACCRGGGTATCTAAT   |
| 806Rcomp028 | CAAGCAGAAGACGGCATAACGAGATTAGCCGTAAGTCAGTCAGCCGGACTACCRGGGTATCTAAT  |
| 806Rcomp029 | CAAGCAGAAGACGGCATAACGAGATTCTGAGTGAGTCAGTCAGCCGGACTACCRGGGTATCTAAT  |
| 806Rcomp030 | CAAGCAGAAGACGGCATAACGAGATGACATCACAGTCAGTCAGCCGGACTACCRGGGTATCTAAT  |
| 806Rcomp031 | CAAGCAGAAGACGGCATAACGAGATCAACACGTAGTCAGTCAGCCGGACTACCRGGGTATCTAAT  |
| 806Rcomp032 | CAAGCAGAAGACGGCATAACGAGATAGGAGTTGAGTCAGTCAGCCGGACTACCRGGGTATCTAAT  |
| 806Rcomp033 | CAAGCAGAAGACGGCATAACGAGATAGAGGTGTAGTCAGTCAGCCGGACTACCRGGGTATCTAAT  |
| 806Rcomp034 | CAAGCAGAAGACGGCATAACGAGATACACAGTCAGTCAGTCAGCCGGACTACCRGGGTATCTAAT  |
| 806Rcomp035 | CAAGCAGAAGACGGCATAACGAGATAACCAACCAGTCAGTCAGCCGGACTACCRGGGTATCTAAT  |
| 806Rcomp036 | CAAGCAGAAGACGGCATAACGAGATGATCACGTAGTCAGTCAGCCGGACTACCRGGGTATCTAAT  |
| 806Rcomp037 | CAAGCAGAAGACGGCATAACGAGATAGACGAGTAGTCAGTCAGCCGGACTACCRGGGTATCTAAT  |
| 806Rcomp038 | CAAGCAGAAGACGGCATAACGAGATTCCACTTTCAGTCAGTCAGCCGGACTACCRGGGTATCTAAT |
| 806Rcomp039 | CAAGCAGAAGACGGCATAACGAGATTACGATCGAGTCAGTCAGCCGGACTACCRGGGTATCTAAT  |
| 806Rcomp040 | CAAGCAGAAGACGGCATAACGAGATTGGTACCAAGTCAGTCAGCCGGACTACCRGGGTATCTAAT  |
| 806Rcomp041 | CAAGCAGAAGACGGCATAACGAGATTGCACAACAGTCAGTCAGCCGGACTACCRGGGTATCTAAT  |
| 806Rcomp042 | CAAGCAGAAGACGGCATAACGAGATTGAGACAGAGTCAGTCAGCCGGACTACCRGGGTATCTAAT  |
| 806Rcomp043 | CAAGCAGAAGACGGCATAACGAGATCGTATTGGAGTCAGTCAGCCGGACTACCRGGGTATCTAAT  |
| 806Rcomp044 | CAAGCAGAAGACGGCATAACGAGATGGTTTCGATAGTCAGTCAGCCGGACTACCRGGGTATCTAAT |
| 806Rcomp045 | CAAGCAGAAGACGGCATAACGAGATTCACACAGTCAGTCAGCCGGACTACCRGGGTATCTAAT    |
| 806Rcomp046 | CAAGCAGAAGACGGCATAACGAGATGCTACGATAGTCAGTCAGCCGGACTACCRGGGTATCTAAT  |
| 806Rcomp047 | CAAGCAGAAGACGGCATAACGAGATACACACAGTCAGTCAGCCGGACTACCRGGGTATCTAAT    |

|             |                                                                    |
|-------------|--------------------------------------------------------------------|
| 806Rcomp048 | CAAGCAGAAGACGGCATAACGAGATAGACCACTAGTCAGTCAGCCGGACTACCRGGGTATCTAAT  |
| 806Rcomp049 | CAAGCAGAAGACGGCATAACGAGATGGCCTATAAGTCAGTCAGCCGGACTACCRGGGTATCTAAT  |
| 806Rcomp050 | CAAGCAGAAGACGGCATAACGAGATGCTTGGATAGTCAGTCAGCCGGACTACCRGGGTATCTAAT  |
| 806Rcomp051 | CAAGCAGAAGACGGCATAACGAGATCCTACGAAAGTCAGTCAGCCGGACTACCRGGGTATCTAAT  |
| 806Rcomp052 | CAAGCAGAAGACGGCATAACGAGATCTGTACTAGTCAGTCAGCCGGACTACCRGGGTATCTAAT   |
| 806Rcomp053 | CAAGCAGAAGACGGCATAACGAGATATCCGCTTAGTCAGTCAGCCGGACTACCRGGGTATCTAAT  |
| 806Rcomp054 | CAAGCAGAAGACGGCATAACGAGATTCTGTAGGTAGTCAGTCAGCCGGACTACCRGGGTATCTAAT |
| 806Rcomp055 | CAAGCAGAAGACGGCATAACGAGATACACGACTAGTCAGTCAGCCGGACTACCRGGGTATCTAAT  |
| 806Rcomp056 | CAAGCAGAAGACGGCATAACGAGATCCAACGATAGTCAGTCAGCCGGACTACCRGGGTATCTAAT  |
| 806Rcomp057 | CAAGCAGAAGACGGCATAACGAGATTATAGCCGAGTCAGTCAGCCGGACTACCRGGGTATCTAAT  |
| 806Rcomp058 | CAAGCAGAAGACGGCATAACGAGATTCTCGTGTAGTCAGTCAGCCGGACTACCRGGGTATCTAAT  |
| 806Rcomp059 | CAAGCAGAAGACGGCATAACGAGATCGCGATATAGTCAGTCAGCCGGACTACCRGGGTATCTAAT  |
| 806Rcomp060 | CAAGCAGAAGACGGCATAACGAGATAAGCATGGAGTCAGTCAGCCGGACTACCRGGGTATCTAAT  |
| 806Rcomp061 | CAAGCAGAAGACGGCATAACGAGATCAACCTAGAGTCAGTCAGCCGGACTACCRGGGTATCTAAT  |
| 806Rcomp062 | CAAGCAGAAGACGGCATAACGAGATAAGCATCCAGTCAGTCAGCCGGACTACCRGGGTATCTAAT  |
| 806Rcomp063 | CAAGCAGAAGACGGCATAACGAGATTGCATGCAAGTCAGTCAGCCGGACTACCRGGGTATCTAAT  |
| 806Rcomp064 | CAAGCAGAAGACGGCATAACGAGATTCTGTGAGAGTCAGTCAGCCGGACTACCRGGGTATCTAAT  |

**QPCR primers**

|            |                        |
|------------|------------------------|
| IlluminaP5 | AATGATACGGCGACCACCGA   |
| IlluminaP7 | CAAGCAGAAGACGGCATAACGA |

**Illumina Sequencing Primers**

|             |                                  |
|-------------|----------------------------------|
| 341FSeqV3   | CTATGGTAATTCTGTCCTACGGRAGGCAGCAG |
| Index_seqV3 | ATTAGATACCCYGGTAGTCCGGCTGACTGACT |
| 806RSeqV3   | AGTCAGTCAGCCGGACTACCRGGGTATCTAAT |
