# Supplementary material
Source: PubMed Central journal article supplement (PMC4681850)

**Supplementary Figure S4:** Overview of the bioinformatics pipeline and the total number of sequences remaining after the different cleaning and processing steps. Sequences were considered “rare” if they occurred less than 5 times in the entire dataset.

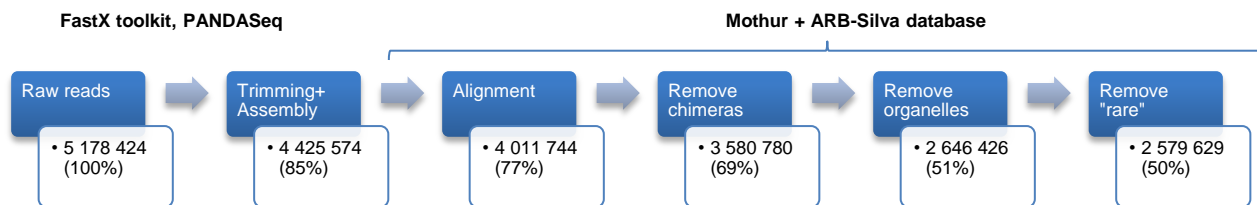

Supplement: ismej2015104x4.pdf [file ismej2015104x4.pdf]
