# Supplementary material
Source: PubMed Central journal article supplement (PMC4681850)

# Supplementary Figure S5: Rarefaction curves

## A - algal samples

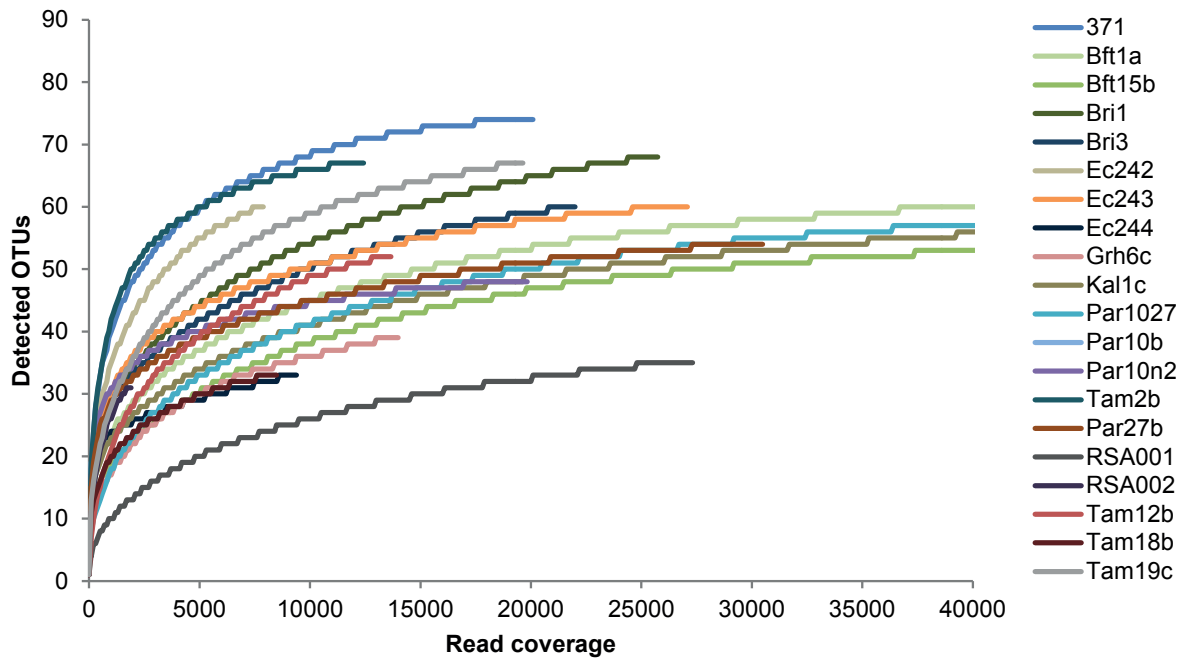

## B - medium samples

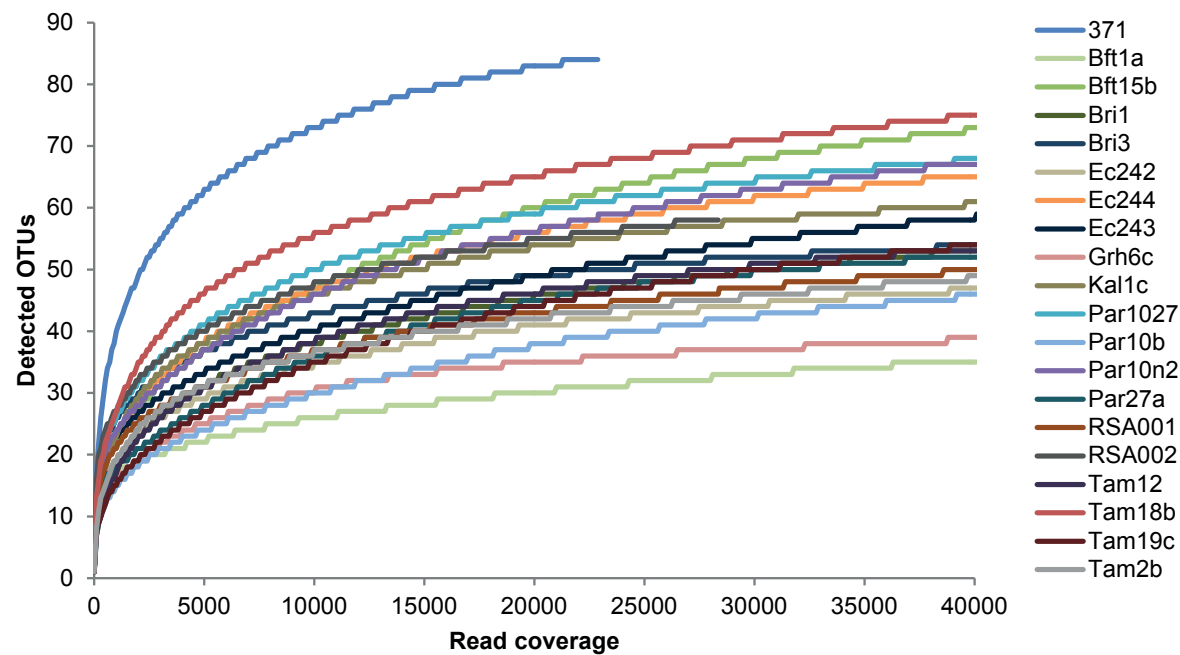

## C - inter-sample

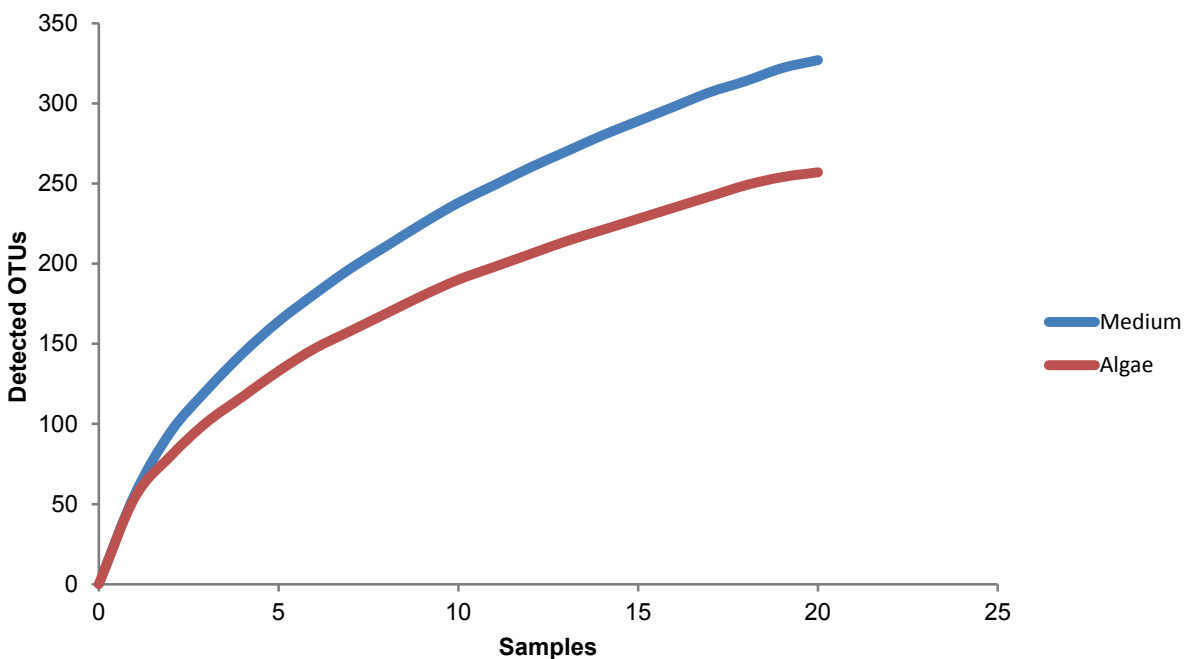

Supplement: ismej2015104x5.pdf [file ismej2015104x5.pdf]
